# Supplementary material
Source: PubMed Central journal article supplement (PMC5495478)
Supplement: NIHMS864380-supplement-SYNONYMOUS_AND_INTRONIC_VARIANTS_IN_AA_CHILDREN.pdf [file NIHMS864380-supplement-SYNONYMOUS_AND_INTRONIC_VARIANTS_IN_AA_CHILDREN.pdf]

**Supplementary Table 1. Innocuous SNPs in African American children with SRNS**

| <b>Gene</b>  | <b>Nucleotide change</b> | <b>Consequence on protein</b> | <b>Frequency(%)</b> |
|--------------|--------------------------|-------------------------------|---------------------|
| <i>NPHS2</i> | c.102G>A het             | p.G34G                        | 27.8                |
| <i>NPHS2</i> | c.288C>T het             | p.S96S                        | 5.6                 |
| <i>NPHS2</i> | IVS3-21C>T het           | intronic                      | 11.1                |
| <i>NPHS2</i> | c.1038A>G het            | p.L346L                       | 16.7                |
| <i>NPHS2</i> | c.954C>T het             | p.A318A                       | 50                  |
| <i>NPHS2</i> | c.954C>T hom             | p.A318A                       | 22.2                |
| <i>WT1</i>   | IVS7-32C>A het           | intronic                      | 27.8                |

het, heterozygous; hom, homozygous
